# Supplementary material for: Genomic Variation and Its Impact on Gene Expression in Drosophila melanogaster
Source: PLoS Genet. 2012 Nov 15;8(11):e1003055. doi: 10.1371/journal.pgen.1003055 (PMC3499359; doi:10.1371/journal.pgen.1003055)
Supplement: Table S1 — Comparison of SNP calls to those by Mackay et al., Nature, 2012. (XLSX) [file pgen.1003055.s017.xlsx]

## Sheet: S1
Table S1. Comparison of SNP calls to those by Mackay et al., Nature, 2012.
	Called by Mackay et al		Called in this study
Line	A Number of variants	B Number of SNPs not within 30 bps of non-SNPs	C Number of variants *	D Number of SNPs not within 30 bps of non-SNPs	Number of exact matches A - C	Number of variants in A overlapping with variants in C	Number of variants in C overlapping with variants in A	% of variants in A matching or overlapping with C	% of variants in C matching or overlapping with A	E Number of Matches B-D	% E / B	% E / D
DGRP-208	674529	526008	803884	537115	608315	30721	30701	0.947381	0.794911	504170	0.958484	0.938663
DGRP-313	682811	560019	799185	558343	614700	22215	22205	0.932784	0.796943	524701	0.936934	0.939747
DGRP-357	644350	519246	778482	534097	588340	22565	22551	0.948095	0.784721	493898	0.951183	0.924735
DGRP-358	695893	557182	824218	561152	623941	26053	26037	0.934043	0.7886	523399	0.939368	0.932722
DGRP-362	636822	523085	778024	533455	589980	19161	19159	0.956533	0.782931	501943	0.959582	0.940928
DGRP-365	653202	518270	787311	527522	597748	26043	26032	0.954974	0.792292	498368	0.961599	0.944734
DGRP-375	690425	534648	807783	539596	609951	33897	33871	0.932539	0.797023	504335	0.943303	0.934653
DGRP-379	643914	524151	782067	531512	591227	21055	21054	0.950875	0.782901	499758	0.953462	0.940257
DGRP-380	621890	492249	789136	526246	558805	25598	25587	0.939721	0.740547	465076	0.944798	0.883762
DGRP-391	713986	544606	820694	542413	626726	37697	37662	0.930583	0.809544	514643	0.944982	0.948803
DGRP-399	665942	525420	788938	532501	603012	28164	28152	0.947794	0.800017	502294	0.955986	0.943273
DGRP-427	668815	526200	790626	534873	604680	29278	29260	0.947882	0.80182	503895	0.957611	0.942083
DGRP-437	648714	521424	777856	534775	587600	24121	24111	0.942975	0.786406	494122	0.94764	0.923981
DGRP-517	697413	533176	812795	539433	612078	35739	35654	0.928886	0.796919	503946	0.945178	0.934214
DGRP-555	652500	516515	791138	528673	598519	25941	25937	0.957027	0.789314	497631	0.96344	0.941283
DGRP-639	651471	519905	784634	527397	594553	23590	23581	0.948842	0.787799	495139	0.952364	0.938835
DGRP-705	655525	522855	791711	530762	601491	23879	23874	0.953999	0.789891	501200	0.958583	0.944303
DGRP-707	659053	524131	784731	526560	598411	25159	25156	0.946161	0.794625	497935	0.95002	0.945638
DGRP-712	648559	515743	776217	519923	591672	23877	23874	0.949103	0.793008	491687	0.953357	0.945692
DGRP-714	682961	548683	790449	532311	597801	24586	24583	0.911307	0.78738	498515	0.908567	0.936511
DGRP-730	587647	499944	781998	525963	551972	14687	14687	0.964285	0.72463	483263	0.966634	0.918816
DGRP-732	753488	621934	783219	532585	592463	23293	23285	0.817207	0.786176	496622	0.798512	0.932475
DGRP-765	661473	529719	780799	528274	597369	23965	23959	0.939319	0.795759	499507	0.942966	0.945545
DGRP-774	668519	551728	738310	514534	554764	21150	21148	0.861477	0.780041	469506	0.850974	0.912488
DGRP-786	695426	564288	809388	562267	627445	24394	24390	0.937323	0.805343	530674	0.940431	0.943811
DGRP-799	654378	519730	778707	522690	595091	24727	24724	0.947186	0.795954	494845	0.952119	0.946728
DGRP-820	647010	517231	786146	527882	587637	22900	22899	0.943628	0.776619	489285	0.94597	0.926883
DGRP-852	704502	541229	821180	544534	626033	35181	35136	0.938555	0.805145	514962	0.951468	0.945693
DGRP-859	646352	514232	773001	517186	588464	23537	23535	0.946854	0.791718	488820	0.950583	0.945153
Total	19307570	15413551	22912627	15474574	17320788	743173	742804	0.93559	0.788368	14484139	0.939702	0.935996
* excluding chromosome 4 (it is not in the other dataset), and with di-nucleotide substitutions represented as pairs of consecutive SNPs for comparison purposes
