# Supplementary material for: Genomic Variation and Its Impact on Gene Expression in Drosophila melanogaster
Source: PLoS Genet. 2012 Nov 15;8(11):e1003055. doi: 10.1371/journal.pgen.1003055 (PMC3499359; doi:10.1371/journal.pgen.1003055)
Supplement: Table S4 — Validation of 92 variants >200 bp using PCR in five DGRP lines. (XLSX) [file pgen.1003055.s020.xlsx]

## Sheet: S4
Table S4. Validation of 92 variants >200 bp using PCR in five DGRP lines
Variant Predictions + PCR worked			249			No variant predicted + PCR worked		199		Variant predicted		255
True Positive - Predicted Size (TP_PS)			194	0.779116		True Negative		117		No variant predicted		205
True Positive - non-Predicted Size (TP_NPS)			37	0.148594		False Negative		82
True Positive - TP_PS + TP_NPS			231	0.927711
False Positive			18	0.0722892
					Category	Count			Category	Count			Category	Count			Category	Count			Category	Count
					TP-PS	39			TP-PS	38			TP-PS	53			TP-PS	26			TP-PS	38
					TN	20			TN	25			TN	26			TN	22			TN	24
					TP-NPS	3			TP-NPS	9			TP-NPS	3			TP-NPS	11			TP-NPS	11
					FP	3			FP	3			FP	1			FP	11			FP	0
					FN	23			FN	14			FN	8			FN	20			FN	17
					Failed	4			Failed	3			Failed	1			Failed	2			Failed	2
		Line
		Reference genome	DGRP-358				DGRP-486				DGRP-707				DGRP-730				DGRP-786
Variant	Type	in silico predicted PCR size (bp)	Predicted variant size (bp)	Predicted PCR size (bp)	Observed size (bp)	Category	Predicted variant size (bp)	Predicted PCR size (bp)	Observed size (bp)	Category	Predicted variant size (bp)	Predicted PCR size (bp)	Observed size (bp)	Category	Predicted variant size (bp)	Predicted PCR size (bp)	Observed size (bp)	Category	Predicted variant size (bp)	Predicted PCR size (bp)	Observed size (bp)	Category
3L:18730092	ins, sd	305	434	739	empty	Failed	0	305	250	TN	0	305	250-300	TN	0	305	250	TN	0	305	250	TN
2L:18408083	del, sd	5031	-4731	300	200-300	TP-PS	-4731	300	250	TP-PS	-4731	300	250-301	TP-PS	-4731	300	250	TP-PS	0	5031	250	FN
2R:13933233	del, sd	521	-299	222	200-250	TP-PS	-299	222	200-250	TP-PS	-299	222	250	TP-PS	0	521	200	FN	0	521	200	FN
3R:19897868	del, sd	649	-385	264	200-300	TP-PS	-385	264	250	TP-PS	-385	264	250	TP-PS	0	649	250	FN	0	649	250	FN
X:7678328	del, sd	548	-249	299	300	TP-PS	0	548	250-300	FN	-249	299	250-300	TP-PS	0	548	300	FN	-249	299	300	TP-PS
X:13295577	del, sd	538	-299	239	200-300	TP-PS	0	538	200-250	FN	-299	239	250	TP-PS	-299	239	700	TP-NPS	-299	239	250	TP-PS
X:18088161	del, sd	845	-482	363	300-400	TP-PS	-482	363	300-350	TP-PS	-482	363	300	TP-PS	-482	363	600	TP-NPS	-482	363	200-250	TP-NPS
2R:1336999*	ins	229	338	567	400-500	TP-NPS	338	567	300-400	TP-NPS	338	567	600	TP-PS	338	567	700-800	TP-NPS	338	567	500	TP-PS
2R:2925687	ins	378	715	1093	500-600	TP-NPS	715	1093	500-600	TP-NPS	715	1093	300-400	FP	715	1093	600-700	TP-NPS	0	378	350	TN
3L:4647552	ins	388	217	605	200-300	FP	217	605	300-400	FP	217	605	600	TP-PS	217	605	400	FP	217	605	600	TP-PS
3L:5284032	ins	342	227	569	500-600	TP-PS	0	342	350-400	TN	227	569	550	TP-PS	0	342	300-400	TN	227	569	500	TP-PS
3L:8388125	ins	250	210	460	400-500	TP-PS	210	460	250-300	FP	210	460	500	TP-PS	210	460	700	TP-NPS	210	460	450	TP-PS
3L:8784431	del, sd	5627	-5367	260	200-300	TP-PS	0	5627	200-250	FN	-5367	260	250	TP-PS	-5367	260	500-600	TP-NPS	-5367	260	250	TP-PS
3L:13626567	del, sd	574	-301	273	300	TP-PS	0	574	500-600	TN	-301	273	250	TP-PS	0	574	600	TN	0	574	600	TN
3R:4056656	del, sd	700	-417	283	200-300	TP-PS	0	700	700	TN	0	700	700	TN	0	700	600-700	TN	0	700	700	TN
3R:12847277	del, sd	707	-427	280	200-300	TP-PS	0	707	700	TN	0	707	700	TN	0	707	400	FN	0	707	700	TN
3R:15261289	del, sd	473	-223	250	200-300	TP-PS	0	473	200-250	FN	-223	250	250	TP-PS	0	473	400-500	TN	0	473	500	TN
3R:16529258	del, sd	666	-341	325	300-400	TP-PS	0	666	650	TN	-341	325	300	TP-PS	0	666	600	TN	0	666	600	TN
3L:16229691	ins, sd	224	0	224	empty	Failed	233	457	empty	Failed	0	224	225	TN	0	224	100-150	FN	0	224	200	TN
2L:16280307	del, sd	1456	-1115	341	300-400	TP-PS	-1118	338	200	TP-NPS	0	1456	350	TN	0	1456	200	FN	-1118	338	400	TP-PS
3L:11716242	del, sd	4974	-4742	232	200-250	TP-PS	-4742	232	150	TP-NPS	-4742	232	250	TP-PS	-4742	232	100	TP-NPS	-4742	232	500	TP-NPS
3R:13417070	del, sd	606	-383	223	200-300	TP-PS	-383	223	100	TP-NPS	-383	223	200	TP-PS	-383	223	100	TP-NPS	0	606	225	FN
3R:13588940	del, sd	685	-433	252	200-250	TP-PS	-433	252	150	TP-NPS	-433	252	250	TP-PS	-433	252	150	TP-NPS	-433	252	250	TP-PS
3R:20752907	del, sd	4967	-4738	229	150-200	TP-PS	-4738	229	200	TP-PS	-4738	229	225	TP-PS	-4738	229	200	TP-PS	-4738	229	200	TP-PS
X:8258927	del, sd	676	0	676	600-700	TN	-344	332	250-300	TP-PS	0	676	300	FN	0	676	250-300	FN	0	676	600	TN
2L:4135868	ins	279	0	279	500-600	FN	286	565	500	TP-PS	0	279	500-600	FN	286	565	500	TP-PS	286	565	500	TP-PS
3L:4934459	ins	314	0	314	400-500	FN	310	624	450	TP-NPS	0	314	300	TN	0	314	500	FN	0	314	500	FN
3R:17502894	ins	259	261	520	500	TP-PS	261	520	500	TP-PS	261	520	500	TP-PS	261	520	500	TP-PS	261	520	500	TP-PS
3R:18934501	ins	239	0	239	500-600	FN	403	642	600	TP-PS	0	239	300-400	FN	0	239	600	FN	0	239	600	FN
X:10060570	ins	361	385	746	700-800	TP-PS	385	746	600-700	TP-PS	385	746	700-800	TP-PS	385	746	700	TP-PS	385	746	700	TP-PS
X:11102799	ins	310	0	310	1000	FN	702	1012	1000	TP-PS	0	310	600-700	FN	0	310	300/800	TN	0	310	1000/300	TN
2L:13493385	del	462	0	462	300-400	TN	-230	232	200-250	TP-PS	0	462	400-500	TN	0	462	400	TN	0	462	500	TN
3L:13451072	del, sd	590	0	590	200-300	FN	-268	322	250	TP-PS	0	590	500-600	TN	0	590	500	TN	0	590	300	FN
3L:15473701	del, sd	660	0	660	500-600	TN	-391	269	200-250	TP-PS	0	660	600-700	TN	0	660	500-600	TN	0	660	500	FN
3L:17783756*	del, sd	495	-212	283	200-250	TP-PS	-212	283	150-200	TP-NPS	-212	283	250-300	TP-PS	-212	283	250	TP-PS	-212	283	200	TP-PS
3R:6813052	del, sd	1045	0	1045	1000	TN	-814	231	200	TP-PS	0	1045	1000	TN	0	1045	1000	TN	0	1045	1000	TN
3R:23295819	del, sd	841	0	841	800-900	TN	-609	232	200	TP-PS	0	841	800	TN	0	841	800	TN	-609	232	200	TP-PS
2L:20976703	del, sd	5002	0	5002	200-250	FN	0	5002	200	FN	-4762	240	250	TP-PS	-4762	240	200-250	TP-PS	0	5002	200	FN
2R:6907442*	del, sd	5273	0	5273	250-300	FN	0	5273	225	FN	-5013	260	250	TP-PS	0	5273	250	FN	0	5273	200	FN
3L:9212405	del, sd	971	-619	352	200-300	TP-PS	0	971	250	FN	-619	352	350	TP-PS	-619	352	250-300	TP-PS	0	971	300	FN
3L:9519644	del, sd	1892	0	1892	200-250	FN	-1627	265	250	TP-PS	-1627	265	250	TP-PS	0	1892	empty	Failed	0	1892	200	FN
3R:26064541	del, sd	1483	-1111	372	250-300	TP-PS	-1111	372	empty	Failed	-1111	372	350	TP-PS	0	1483	350	FN	-1111	372	400	TP-PS
X:19366219*	del, sd	748	0	748	200	FN	0	748	200	FN	-517	231	250	TP-PS	-517	231	250	TP-PS	-517	231	200	TP-PS
2L:15140409	ins, sd	315	0	315	200-250	FN	0	315	250	TN	424	739	empty	Failed	0	315	300	TN	0	315	300	TN
2L:20223179	ins	251	226	477	500	TP-PS	226	477	450	TP-PS	226	477	500	TP-PS	226	477	500	TP-PS	226	477	500	TP-PS
2R:92535	ins	248	0	248	200-250	TN	0	248	250	TN	388	636	1000	TP-NPS	388	636	200	FP	0	248	250	TN
3R:16308873	ins	270	246	516	400-500	TP-PS	246	516	400-500	TP-PS	246	516	500	TP-PS	246	516	400-500	TP-PS	246	516	400	TP-NPS
3R:27772929	ins	255	1430	1685	1000	TP-NPS	1430	1685	900	TP-NPS	1430	1685	1000	TP-NPS	1430	1685	900	TP-NPS	1430	1685	1000	TP-NPS
X:3473263	ins	254	342	596	600-700	TP-PS	342	596	600	TP-PS	342	596	600	TP-PS	0	254	500-600	FN	342	596	500-600	TP-PS
2L:2250472*	del	1032	-714	318	200-250	TP-PS	-714	318	300	TP-PS	-714	318	300	TP-PS	0	1032	1000	TN	-714	318	250	TP-PS
2L:22899292	del	953	0	953	1000	TN	0	953	1000	TN	-623	330	300	TP-PS	-623	330	800	FP	0	953	900	TN
3L:88799	del, sd	2095	0	2095	2000	TN	-1867	228	200	TP-PS	-1867	228	200	TP-PS	-1867	228	2000	FP	0	2095	2000	TN
3L:5250784	del, sd	468	0	468	500	TN	0	468	450	TN	-235	233	250	TP-PS	0	468	200	FN	0	468	400	TN
3R:13172467	del, sd	1828	0	1828	550-600	FN	-1510	318	300	TP-PS	-1510	318	300	TP-PS	0	1828	250	FN	0	1828	200	FN
3R:26726311	del, sd	1304	0	1304	200	FN	0	1304	1200	TN	-1082	222	200	TP-PS	0	1304	1000	FN	0	1304	1300	TN
2R:871632	ins, sd	286	0	286	300/500	TN	306	592	300/600	TP-PS	306	592	700	TP-PS	306	592	250/500/800	Failed	306	592	700/200	TP-NPS
2L:5342828	del, sd	2566	0	2566	250	FN	-2327	239	200	TP-PS	-2327	239	250	TP-PS	-2327	239	200-250	TP-PS	0	2566	250	FN
2L:14890012	del, sd	605	-372	233	200	TP-PS	-372	233	200	TP-PS	0	605	600-700	TN	-372	233	200-250	TP-PS	-372	233	200-250	TP-PS
2R:6867215*	del, sd	674	-415	259	200-250	TP-PS	-417	257	250	TP-PS	-415	259	250	TP-PS	-417	257	200-250	TP-PS	0	674	200-250	FN
3L:1485765	del, sd	1357	0	1357	200	FN	0	1357	200	FN	-1114	243	200	TP-PS	-1114	243	200	TP-PS	-1114	243	200	TP-PS
3R:2563278*	del, sd	1964	0	1964	200	FN	-1734	230	200	TP-PS	-1734	230	200	TP-PS	-1734	230	200	TP-PS	-1734	230	200	TP-PS
3R:24127886	del, sd	640	0	640	200	FN	-386	254	250	TP-PS	0	640	200	FN	-386	254	200	TP-PS	0	640	200	FN
2L:21335629	ins	339	0	339	300-400	TN	0	339	600	FN	0	339	300	TN	245	584	300	FP	492	831	500	TP-NPS
2R:11464188	ins	258	0	258	500-600	FN	0	258	500	FN	0	258	500-600	FN	376	634	500-600	TP-PS	0	258	empty	Failed
3L:21038647	ins	278	244	522	500-600	TP-PS	244	522	450	TP-PS	0	278	500	FN	244	522	500	TP-PS	244	522	500	TP-PS
3R:16298431	ins	337	0	337	600-700	FN	271	608	600	TP-PS	0	337	600	FN	271	608	600	TP-PS	0	337	500	FN
X:3673687	ins	308	464	772	700-800	TP-PS	464	772	800	TP-PS	464	772	700-800	TP-PS	464	772	300	FP	464	772	700	TP-PS
X:5942951	ins	279	200	479	300	FP	200	479	300	FP	200	479	300-400	TP-PS	200	479	200-250	FP	200	479	350	TP-NPS
2L:1883475	del	808	0	808	800	TN	0	808	800	TN	-527	281	250-300	TP-PS	-527	281	250-300	TP-PS	0	808	800	TN
2R:1210189*	del, sd	648	0	648	600-700	TN	0	648	700	TN	-359	289	300	TP-PS	-359	289	250-300	TP-PS	0	648	700	TN
3L:4658021	del, sd	740	0	740	700-800	TN	-409	331	300	TP-PS	0	740	700	TN	-409	331	600-700	FP	0	740	700	TN
3L:9507729	del, sd	494	0	494	empty	Failed	0	494	500	TN	0	494	400-500	TN	-244	250	400-500	FP	0	494	500	TN
3R:957075	del, sd	602	0	602	500-600	TN	0	602	600	TN	0	602	600	TN	-308	294	500-600	FP	0	602	600	TN
3R:5201140	del, sd	661	0	661	600-700	TN	0	661	600-700	TN	0	661	600	TN	-369	292	600	FP	0	661	300	TN
3L:17639837	ins, sd	269	0	269	600-700	FN	0	269	250	TN	0	269	250-300	TN	0	269	250	TN	281	550	400	TP-NPS
2L:20835862	del, sd	994	0	994	200-300	FN	0	994	450	FN	-664	330	200-250	TP-PS	0	994	300	FN	-664	330	300	TP-PS
3L:3281499*	del, sd	727	-443	284	200-300	TP-PS	-443	284	250	TP-PS	-443	284	250-300	TP-PS	-443	284	250	TP-PS	-443	284	250-300	TP-PS
3L:19002002	del, sd	506	-285	221	200-300	TP-PS	-285	221	200	TP-PS	-285	221	200-250	TP-PS	-285	221	200	TP-PS	-285	221	200	TP-PS
3L:21630748	del, sd	574	-292	282	200-300	TP-PS	0	574	600	TN	-292	282	250-300	TP-PS	0	574	400	TN	-292	282	250-300	TP-PS
3R:4533136	del, sd	2614	0	2614	200-300	FN	0	2614	250	FN	-2388	226	200	TP-PS	-2388	226	200	TP-PS	-2388	226	200	TP-PS
2L:19796933	ins	223	212	435	200-300	FP	0	223	350	FN	212	435	300	TP-NPS	212	435	300	TP-NPS	212	435	300	TP-NPS
2L:21360458	ins	329	0	329	empty	Failed	0	329	300	TN	0	329	300-350	TN	0	329	300	TN	325	654	empty	Failed
2R:949842	ins	225	0	225	300-400	FN	0	225	200	TN	0	225	200-250	TN	0	225	200	TN	306	531	350	TP-NPS
2R:20409177	ins	232	258	490	500	TP-PS	0	232	200	TN	258	490	500	TP-PS	258	490	450	TP-PS	258	490	500	TP-PS
3L:19378244**	ins	221	0	221	200-300	TN	0	221	200	TN	0	221	200-250	TN	0	221	300	TN	210	431	300	TP-NPS
X:10051013	ins	357	202	559	500-600	TP-PS	202	559	500	TP-PS	202	559	500	TP-PS	0	357	350-400	TN	202	559	500	TP-PS
2L:22445646	del	660	0	660	300-400	FN	-301	359	300	TP-PS	0	660	600	TN	0	660	300	FN	-301	359	350	TP-PS
2R:508925	del, sd	735	-437	298	300	TP-PS	0	735	empty	Failed	0	735	700-800	TN	0	735	200-250	FN	-437	298	250	TP-PS
2R:1012809	del, sd	484	-261	223	200-300	TP-PS	-261	223	200	TP-PS	-261	223	225	TP-PS	0	484	200	FN	-261	223	200	TP-PS
3L:8213463	del, sd	475	0	475	500	TN	0	475	500	TN	0	475	400-500	TN	0	475	450	TN	-236	239	200-250	TP-PS
3L:9102907	del, sd	786	0	786	700-800	TN	0	786	700	TN	0	786	700-800	TN	0	786	600	FN	-552	234	200-250	TP-PS
X:12734005	del, sd	512	0	512	500-600	TN	0	512	500	TN	0	512	500	TN	0	512	500	TN	-272	240	200-250	TP-PS
*Indel breakpoints validated by Sanger sequencing
**Indel breakpoints not validated by Sanger sequencing
